# Supplementary material for: Effects of Algal Extracellular Polymeric Substances on the Formation of Filamentous Manganese Oxide Particles in the near-Bottom Layer of Lake Biwa
Source: Preprints.org preprint supplement (doi:10.20944/preprints202306.1538.v1), 2023-06-25
Supplement: Supplementary file 3 [file supplementary]

Effects of Algal Extracellular Polymeric Substances on the Formation of Filamentous Manganese Oxide Particles in the near-Bottom Layer of Lake Biwa

Seiko Furuta 1,2, Hisato Ikegaya 3, Megumu Fujibayashi 4, Hideki Hashimoto 5, Shiro Suzuki 6, Kunihiro Okano 2, Satoshi Ichise 1 and Naoyuki Miyata 2,*

1 Lake Biwa Environmental Research Institute, Ohtsu 520-0022, Japan; furuta-3@ex.bw.dream.jp (S.F.); ichise_home0115@kxf.biglobe.ne.jp (S.I.)

2 Department of Biological Environment, Akita Prefectural University, Akita 010-0195, Japan; k_okano@akita-pu.ac.jp

3 Department of Biology, Kobe University, Kobe 657-0013, Japan; ikegaya16@people.kobe-u.ac.jp

4 Faculty of Engineering, Kyushu University, Fukuoka 819-0395, Japan; m.fujibayashi@civil.kyushu-u.ac.jp

5 Department of Applied Chemistry, Kogakuin University, Tokyo 192-0015, Japan; hideki-h@cc.kogakuin.ac.jp

6 Faculty of Applied Biological Sciences, Gifu University, Gifu 501-1193, Japan; suzuki.shiro.n5s@f.gifu-u.ac.jp

***** Correspondence: nmiyata@akita-pu.ac.jp; Tel.: +8118 872 1660

Table S1. Composition of CT medium [27]

|  | Concentration (L-1) |
| --- | --- |
| Ca(NO3)2⋅4H2O | 15 mg |
| KNO3 | 10 mg |
| MgSO4⋅7H2O | 4 mg |
| Disodium β-glycerophosphate | 5 mg |
| Thiamin hydrochloride | 1 μg |
| Cyanocobalamin | 0.01 μg |
| Biotin | 0.01 μg |
| TAPS | 10 mg |
| PIV metal salts soln.* | 0.3 mL |
| *This solution contained (per liter) 19.6 mg of FeCl3⋅6H2O, 3.6 mg of MnCl2⋅4H2O, 2.2 mg of ZnCl2⋅7H2O, 0.4 mg of CoCl2⋅6H2O, 0.25 mg of Na2MoO4⋅2H2O, and 100 mg of Na2EDTA⋅2H2O (pH 8.2). | |


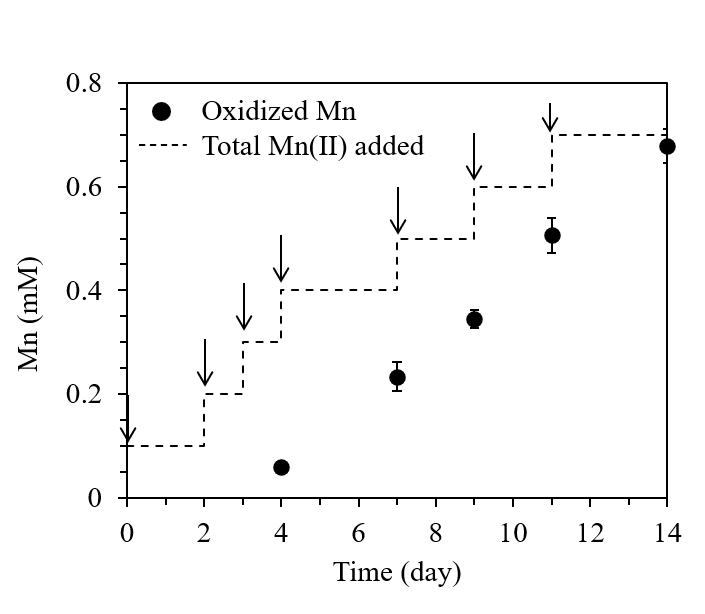


Figure S1. Mn(II) oxidation by *Bosea* sp. BIWAKO-01 in agar-containing cultures. Mn(II) ions were added at a concentration of 0.1 mM at the time indicated by the arrow. Data from triplicate cultures are represented as means ± SD.


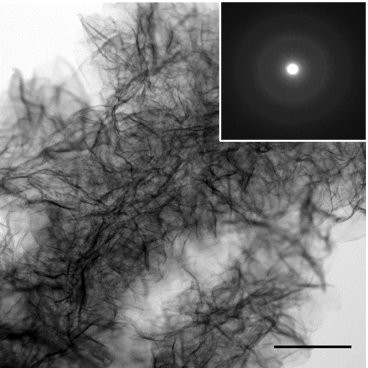


Figure S2. TEM image of filamentous Mn oxide particle collected at a depth of 90 m at the study site of Lake Biwa. The high magnification image shows that the filaments consist of sheet-type structure. Bar: 500 nm. Inset, SAED pattern obtained for the sheet-type structure with *d* values of 0.253 and 0.148 nm.


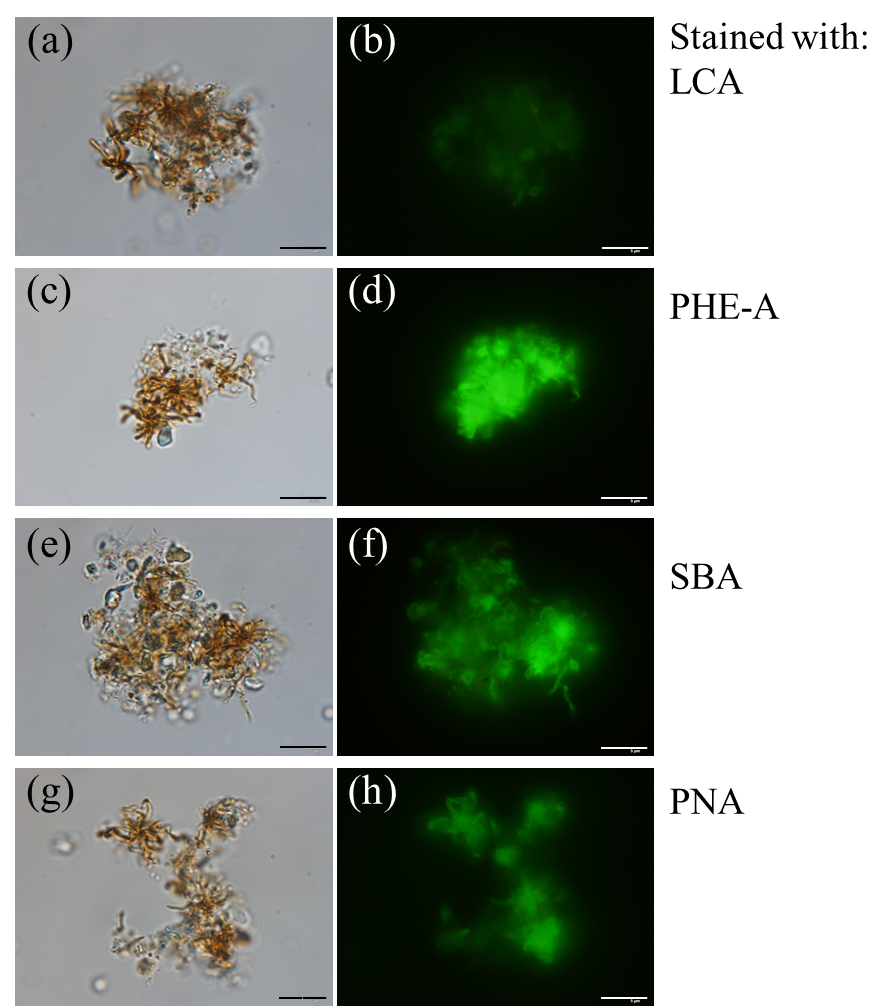


Figure S3. Differential interference contrast and epifluorescence images of aggregates collected at a depth of 90 m at the study site of Lake Biwa. The aggregates were stained with fluorescein-conjugated LCA (a, b), PHA-E (c, d), SBA (e, f), and PNA (g, h). Bar: 10 μm.


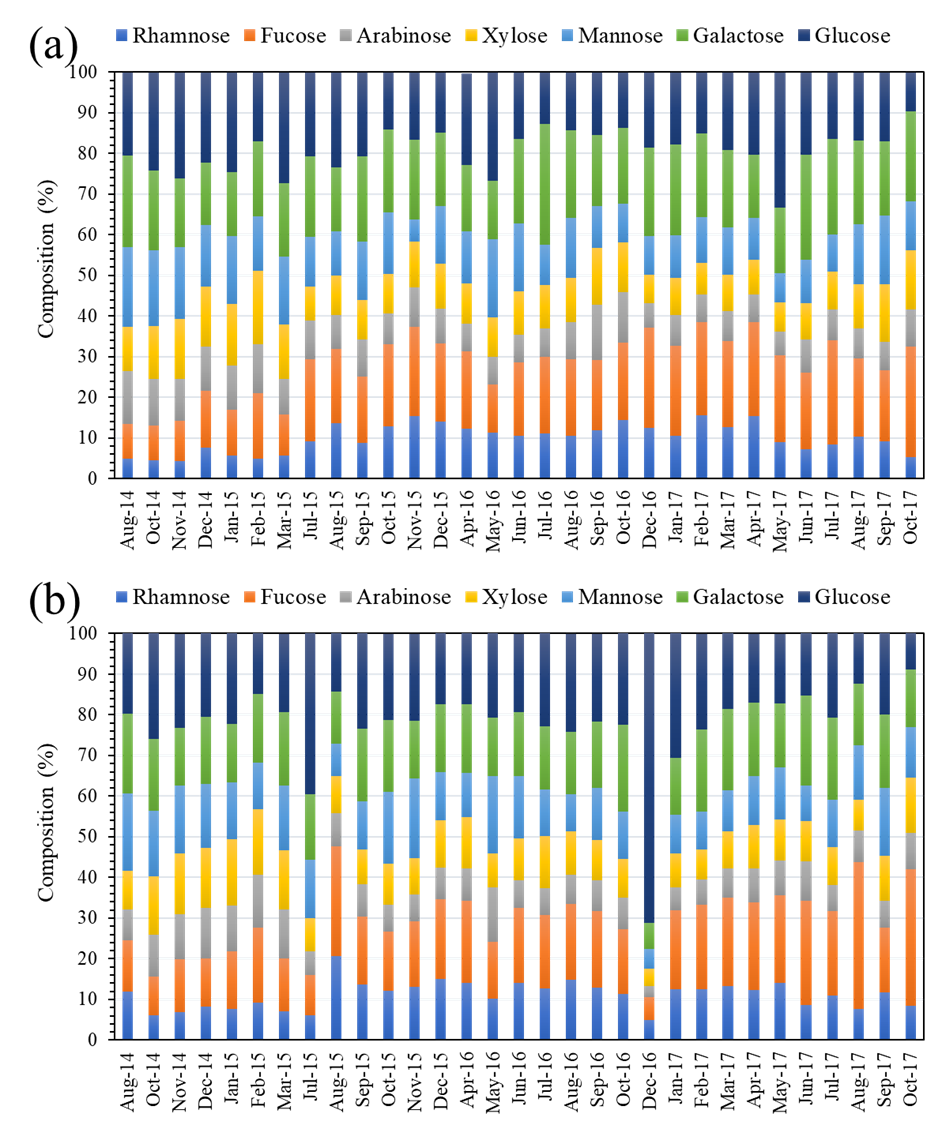


Figure S4. Neutral monosaccharides detected in the total polysaccharides collected from the lake waters at 0.5 m (a) and 90 m (b) during 2014-2017.
